# Supplementary material for: One in three highly selected Greek patients with breast cancer carries a loss-of-function variant in a cancer susceptibility gene
Source: PubMed Central journal article supplement — J Med Genet. 2019 Jul 12;57(1):53–61. doi: 10.1136/jmedgenet-2019-106189 (PMC6929701; doi:10.1136/jmedgenet-2019-106189), 2019-07-12
Supplement: jmedgenet-2019-106189supp003.pdf [file jmedgenet-2019-106189supp003.pdf]

**Table 1.** Gene list analyzed by the panel in the study, in alphabetical order.

AIP, ALK, APC, ATM, BAP1, BLM, BMPR1A, BRCA1, BRCA2, BRIP1, BUB1B, CDC73, CDH1, CDK4, CDKN1C, CDKN2A, CEBPA, CEP57, CHEK2, CYLD, DDB2, DICER1, DIS3L2, EGFR, EPCAM, ERCC2, ERCC3, ERCC4, ERCC5, EXT1, EXT2, EZH2, FANCA, FANCB, FANCC, FANCD2, FANCE, FANCF, FANCG, FANCI, FANCL, FANCM, FH, FLCN, GATA2, GPC3, HNF1A, HRAS, KIT, MAX, MEN1, MET, MLH1, MSH2, MSH6, MUTYH, NBN, NF1, NF2, NSD1, PALB2, PHOX2B, PMS1, PMS2, PRF1, PRKAR1A, PTCH1, PTEN, RAD51C, RAD51D, RB1, RECQL4, RET, RHBDF2, RUNX1, SBDS, SDHAF2, SDHB, SDHC, SDHD, SLX4, SMAD4, SMARCB1, STK11, SUFU, TMEM127, TP53, TSC1, TSC2, VHL, WRN, WT1, XPA, XPC
