# Supplementary material for: One in three highly selected Greek patients with breast cancer carries a loss-of-function variant in a cancer susceptibility gene
Source: PubMed Central journal article supplement — J Med Genet. 2019 Jul 12;57(1):53–61. doi: 10.1136/jmedgenet-2019-106189 (PMC6929701; doi:10.1136/jmedgenet-2019-106189), 2019-07-12
Supplement: jmedgenet-2019-106189supp004.pdf [file jmedgenet-2019-106189supp004.pdf]

**Supplementary Table 2.** *In silico* predictions and functional assays results for *BRCA1*, *BRCA2*, *CHEK2* and *TP53* missense variants classified as loss-of-function.

| Gene (RefSeq)                  | Nucleotide change | Predicted Protein change | Domain                 | SIFT      | Align GVDG | Poly Phen2        | phastCons | PhyloP | Mutation Taster         | Functional assay Results                                                                                                                                                                                  | ClinVar Classification       |
|--------------------------------|-------------------|--------------------------|------------------------|-----------|------------|-------------------|-----------|--------|-------------------------|-----------------------------------------------------------------------------------------------------------------------------------------------------------------------------------------------------------|------------------------------|
| <i>BRCA1</i><br>(NM_007294.3)  | c.181T>G          | p.Cys61Gly               | RING-finger            | Damaging  | C65        | Benign            | 1         | 2.861  | Disease causing (0.992) | <b>Defective impact on protein function</b> (Homology directed recombination assay & Protein binding ability assay) <sup>1</sup> , <b>Mutant</b> (E3 Ub-ligase activity assay) <sup>2</sup>               | Pathogenic                   |
| <i>BRCA1</i><br>(NM_007294.3)  | c.5212G>A         | p.Gly1738Arg             | C-terminal BRCT region | Damaging  | C65        | Possibly damaging | 1         | 2.959  | Disease causing (0.999) | <b>Deleterious</b> (protease-based assay) <sup>3</sup> , <b>Mutant</b> (peptide binding ability assay), <b>Strong functional effect</b> (Transcription activation) <sup>4</sup>                           | Pathogenic                   |
| <i>BRCA1</i><br>(NM_007294.3)  | c.5246C>G         | p.Pro1749Arg             | C-terminal BRCT region | Damaging  | C65        | Benign            | 1         | 2.959  | Disease causing (0.999) | <b>Deleterious</b> <sup>3</sup> (protease-based assay), <b>Strong functional effect</b> (Transcription activation) <sup>4</sup>                                                                           | Pathogenic                   |
| <i>BRCA1</i><br>(NM_007294.3)  | c.5425G>T         | p.Val1809Phe             | C-terminal BRCT region | Damaging  | C65        | Benign            | 1         | 3.01   | Disease causing (0.999) | <b>Deleterious</b> <sup>3</sup> (protease-based assay), <b>Strong functional effect</b> (Transcription activation) <sup>4</sup>                                                                           | Likely Pathogenic            |
| <i>BRCA1</i><br>(NM_007294.3)  | c.5497G>A         | p.Val1833Met             | C-terminal BRCT region | Damaging  | C15        | Probably damaging | 1         | 3.088  | Disease causing (0.999) | <b>Deleterious</b> (Transcription activation property of <i>BRCA1</i> in human cells) <sup>5</sup> , <b>Deleterious-Destabilizing</b> (Thermodynamic stability prediction-biophysical assay) <sup>6</sup> | Likely Pathogenic            |
| <i>BRCA2</i><br>(NM_000059.3)  | c.7879A>T         | p.Ile2627Phe             | BRCA-2-helical         | Damaging  | C15        | Probably damaging | 1         | 1.777  | Disease causing (0.999) | <b>As mutant control/Inactivated</b> (Centrosome amplification assay) <sup>7</sup> , <b>Predicted Pathogenic</b> (Homology directed repair assay) <sup>8-10</sup>                                         | Pathogenic                   |
| <i>CDKN2A</i><br>(NM_000077.4) | c.71G>C           | p.Arg24Pro               | ANK                    | Tolerated | -          | Probably damaging | 0.085     | 0.647  | Disease causing (0.999) | N/A                                                                                                                                                                                                       | Pathogenic/Likely Pathogenic |
| <i>CHEK2</i><br>(NM_007194.3)  | c.475T>C          | p.Tyr159His              | FHA                    | Damaging  | C65        | Probably damaging | 1         | 3.51   | Disease causing (0.999) | N/A                                                                                                                                                                                                       | Unknown Significance         |
| <i>CHEK2</i><br>(NM_007194.3)  | c.499G>A          | p.Gly167Arg              | FHA                    | Damaging  | C65        | Probably damaging | 1         | 4.205  | Disease causing (0.999) | <b>Damaging</b> (DNA repair assay) <sup>9</sup>                                                                                                                                                           | Likely Pathogenic            |
| <i>CHEK2</i><br>(NM_007194.3)  | c.548T>C          | p.Leu183Ser              | FHA                    | Damaging  | C65        | Probably damaging | 0.988     | 3.51   | Disease causing (0.999) | <b>Damaging</b> (DNA repair assay)**                                                                                                                                                                      | N/A                          |
| <i>CHEK2</i><br>(NM_007194.3)  | c.549G>C          | p.Leu183Phe              | FHA                    | Damaging  | C15        | Probably damaging | 0.995     | 1.26   | Disease causing (0.999) | <b>Damaging</b> (DNA repair assay)**                                                                                                                                                                      | Unknown Significance         |

|                                       |           |             |                            |          |     |                   |       |       |                         |                                                                         |                      |
|---------------------------------------|-----------|-------------|----------------------------|----------|-----|-------------------|-------|-------|-------------------------|-------------------------------------------------------------------------|----------------------|
| <i>TP53</i><br>( <i>NM_000546.5</i> ) | c.578A>T  | p.His193Leu | DNA-binding domain         | Damaging | C65 | Probably damaging | 0.998 | 3.095 | Disease causing (0.999) | <b>Non-Functional</b><br>(Transcriptional activity) <sup>11</sup>       | Likely Pathogenic    |
| <i>TP53</i><br>( <i>NM_000546.5</i> ) | c.847C>T  | p.Arg283Cys | DNA-binding domain         | Damaging | C55 | Benign            | 0.188 | 2.044 | Disease causing (0.890) | <b>Partially Functional</b><br>(Transcriptional activity) <sup>11</sup> | Unknown Significance |
| <i>TP53</i><br>( <i>NM_000546.5</i> ) | c.1021T>G | p.Phe341Val | TP53-tetramerization motif | Damaging | C0  | Benign            | 0.932 | 0.027 | Disease causing (0.986) | <b>Partially Functional</b><br>(Transcriptional activity) <sup>11</sup> | N/A                  |

**Notes:** Missense variants identified during the study have been evaluated and classified. Of these, seventeen variants in five genes (*BRCA1*, *BRCA2*, *CHEK2*, *TP53* and *CDKN2A*) have been classified as loss-of-function. These were, ***BRCA1***: c.181T>G, c.5212G>A, c.5246C>G, c.5425G>T, c.5497G>A and c.5467G>A, ***BRCA2***: c.7879A>T, c.7976G>A and c.7006C>T, ***CHEK2***: c.475T>C, c.499G>A, c.548T>C and c.549G>C, ***TP53***: c.578A>T, c.847C>T and c.1021T>G, ***CDKN2A***: c.71G>C. Of these, ***BRCA1***, c.5467G>A, ***BRCA2***, c.7976 G>A and c.7007G>A, involve base changes in the last nucleotide of an exon and were previously shown to cause aberrant splicing.

Most of the *BRCA1* variants reported herein are either recurrent or have a founder effect among Greek individuals, while there are multiple families with complete segregation of the missense variant along with breast and/or ovarian cancer. *CHEK2* missense variants, lying in the forkhead-associated domain (FHA), have been also identified in multiple Greek families/individuals with strong family history for breast cancer and have been categorized as damaging by a *Saccharomyces cerevisiae* yeast functional assay (Delimitsou et al, under revision). *CDKN2A* c.71G>C variant has shown an impaired binding ability to *CDK4*, has been reported in melanoma/pancreatic families and is classified as pathogenic on ClinVar.

### Supplementary References

1. Ransburgh DJ, Chiba N, Ishioka C, Toland AE, Parvin JD. Identification of breast tumor mutations in *BRCA1* that abolish its function in homologous DNA recombination. *Cancer research*. 2010;70(3):988-995.
2. Morris JR, Pangon L, Boutell C, Katagiri T, Keep NH, Solomon E. Genetic analysis of *BRCA1* ubiquitin ligase activity and its relationship to breast cancer susceptibility. *Human molecular genetics*. 2006;15(4):599-606.
3. Williams RS, Chasman DJ, Hau DD, Hui B, Lau AY, Glover JN. Detection of protein folding defects caused by *BRCA1*-BRCT truncation and missense mutations. *The Journal of biological chemistry*. 2003;278(52):53007-53016.
4. Lee MS, Green R, Marsillac SM, et al. Comprehensive analysis of missense variations in the BRCT domain of *BRCA1* by structural and functional assays. *Cancer research*. 2010;70(12):4880-4890.
5. Carvalho M, Pino MA, Karchin R, et al. Analysis of a set of missense, frameshift, and in-frame deletion variants of *BRCA1*. *Mutation research*. 2009;660(1-2):1-11.
6. Rowling PJ, Cook R, Itzhaki LS. Toward classification of *BRCA1* missense variants using a biophysical approach. *The Journal of biological chemistry*. 2010;285(26):20080-20087.
7. Farrugia DJ, Agarwal MK, Pankratz VS, et al. Functional assays for classification of *BRCA2* variants of uncertain significance. *Cancer research*. 2008;68(9):3523-3531.
8. Guidugli L, Pankratz VS, Singh N, et al. A classification model for *BRCA2* DNA binding domain missense variants based on homology-directed repair activity. *Cancer research*. 2013;73(1):265-275.
9. Roeb W, Higgins J, King MC. Response to DNA damage of *CHEK2* missense mutations in familial breast cancer. *Human molecular genetics*. 2012;21(12):2738-2744.
10. Schwarz JK, Lovly CM, Piwnica-Worms H. Regulation of the Chk2 protein kinase by oligomerization-mediated cis- and trans-phosphorylation. *Molecular cancer research : MCR*. 2003;1(8):598-609.
11. Kato S, Han SY, Liu W, et al. Understanding the function-structure and function-mutation relationships of p53 tumor suppressor protein by high-resolution missense mutation analysis. *Proceedings of the National Academy of Sciences of the United States of America*. 2003;100(14):8424-8429.

\*\* Delimitsou et al, under revision
