# Supplementary material for: One in three highly selected Greek patients with breast cancer carries a loss-of-function variant in a cancer susceptibility gene
Source: PubMed Central journal article supplement — J Med Genet. 2019 Jul 12;57(1):53–61. doi: 10.1136/jmedgenet-2019-106189 (PMC6929701; doi:10.1136/jmedgenet-2019-106189), 2019-07-12
Supplement: jmedgenet-2019-106189supp005.pdf [file jmedgenet-2019-106189supp005.pdf]

**Supplementary Table 3.** Description of the loss-of-function variants identified in the study along with patients' age at diagnosis, personal and family history.

| Patient ID | Gene  | DNA variation               | Predicted Protein consequence | Brca 1 dx | BrCa 2 dx | Other Ca dx | FH  | TNBC |
|------------|-------|-----------------------------|-------------------------------|-----------|-----------|-------------|-----|------|
| F2352      | ATM   | c.1215delT                  | p.Asn405fs                    | 37        |           |             | yes | no   |
| F2572      | ATM   | c.1215delT                  | p.Asn405fs                    | 37        |           |             | yes | no   |
| F2892      | ATM   | c.1215delT                  | p.Asn405fs                    | 33        |           |             | no  | no   |
| F622       | ATM   | c.1215delT                  | p.Asn405fs                    | 35        | 35        |             | no  | no   |
| F979       | ATM   | c.2250G>A                   | p.Glu709_Lys750del            | 43        | 43        |             | yes | no   |
| F965       | ATM   | c.2921+1G>A                 | p.Ser974_Trp1026del           | 47        | 54        |             | yes | no   |
| F2237      | ATM   | c.3576G>A                   | p.Ser1135_Lys1192del          | 35        |           |             | no  | no   |
| F735       | ATM   | c.4683_4689delTTTAGAT       | p.Asp1563fs                   | 38        |           |             | yes | no   |
| F805       | ATM   | c.5644C>T                   | p.Arg1882Ter                  | 34        |           |             | yes | no   |
| F1353      | ATM   | c.5932G>T                   | p.Gly1978Ter                  | 47        |           |             | yes | no   |
| F985       | ATM   | c.7307delG                  | p.Arg2436fs                   | 36        | 36        |             | yes | no   |
| F2759      | ATM   | c.757G>T                    | p.Glu253Ter                   | 46        |           |             | yes | no   |
| F2360      | ATM   | c.8218C>T                   | p.Gln2740Ter                  | 57        |           | EndCa 57    | yes | yes  |
| F2570      | ATM   | c.8395_8404delTTTCAGTGCC    | p.Phe2799fs                   | 39        |           |             | yes | no   |
| F2771      | ATM   | c.8766dupT                  | p.Val2923fs                   | 55        | 55        |             | yes | no   |
| F1624      | ATM   | c.8925_8928dupAGAT          | p.Glu2977fs                   | 59        |           |             | yes | no   |
| F2769      | BLM   | c.1642C>T                   | p.Gln548Ter                   | 43        |           |             | yes | no   |
| F2394      | BRCA1 | c.(?-4600)_(249+1_250-1)del | p.?                           | 23        |           |             | yes | yes  |
| F2762      | BRCA1 | c.68_69delAG                | p.Glu23fs                     | 47        | 55        |             | yes | yes  |
| F1126      | BRCA1 | c.181T>G                    | p.Cys61Gly                    | 37        |           |             | yes | yes  |
| F1164      | BRCA1 | c.181T>G                    | p.Cys61Gly                    | 46        | 52        |             | yes | yes  |
| F1249      | BRCA1 | c.181T>G                    | p.Cys61Gly                    | 38        | 39        |             | yes | yes  |
| F1257      | BRCA1 | c.181T>G                    | p.Cys61Gly                    | 41        |           |             | yes | yes  |
| F2235      | BRCA1 | c.181T>G                    | p.Cys61Gly                    | 33        |           |             | yes | yes  |
| F2327      | BRCA1 | c.181T>G                    | p.Cys61Gly                    | 32        |           | OvCa 49     | yes | yes  |
| F2357      | BRCA1 | c.181T>G                    | p.Cys61Gly                    | 57        |           | OvCa 60     | yes | no   |
| F2400      | BRCA1 | c.181T>G                    | p.Cys61Gly                    | 33        |           |             | yes | yes  |
| F2501      | BRCA1 | c.181T>G                    | p.Cys61Gly                    | 58        |           | OvCa 40     | yes | yes  |
| F2672      | BRCA1 | c.181T>G                    | p.Cys61Gly                    | 34        |           |             | yes | no   |
| F324       | BRCA1 | c.181T>G                    | p.Cys61Gly                    | 37        | 42        |             | yes | N/A  |
| F849       | BRCA1 | c.181T>G                    | p.Cys61Gly                    | 43        | 54        |             | yes | yes  |
| F1472      | BRCA1 | c.302-2A>G                  | p.?                           | 25        |           |             | yes | yes  |
| F1085      | BRCA1 | c.331delG                   | p.Glu111fs                    | 55        |           |             | yes | yes  |

|       |       |                     |                |    |    |         |     |     |
|-------|-------|---------------------|----------------|----|----|---------|-----|-----|
| F2486 | BRCA1 | c.331delG           | p.Glu111fs     | 36 | 49 | OvCa 42 | yes | no  |
| F1238 | BRCA1 | c.1058G>A           | p.Trp353Ter    | 30 |    |         | yes | yes |
| F1936 | BRCA1 | c.1058G>A           | p.Trp353Ter    | 33 |    |         | N/A | yes |
| F1181 | BRCA1 | c.1210_1211insCT    | p.Glu404fs     | 39 |    | OvCa 50 | yes | yes |
| F315  | BRCA1 | c.1504_1508delTTAAA | p.Leu502fs     | 25 |    |         | yes | N/A |
| F932  | BRCA1 | c.1504_1508delTTAAA | p.Leu502fs     | 47 |    |         | yes | yes |
| F1708 | BRCA1 | c.2504dupA          | p.His835fs     | 66 |    |         | yes | yes |
| F2346 | BRCA1 | c.2504dupA          | p.His835fs     | 36 |    | OvCa 56 | yes | yes |
| F796  | BRCA1 | c.2963C>A           | p.Ser988Ter    | 29 |    |         | no  | yes |
| F145  | BRCA1 | c.3158_3159insG     | p.Val1054fs    | 62 |    | OvCa 71 | yes | N/A |
| F1016 | BRCA1 | c.3178G>T           | p.Glu1060Ter   | 34 |    |         | yes | no  |
| F1144 | BRCA1 | c.3375_3376delTC    | p.Pro1126fs    | 20 | 48 |         | no  | yes |
| F2014 | BRCA1 | c.3375_3376delTC    | p.Pro1126Ilefs | 43 |    | OvCa 47 | yes | yes |
| F483  | BRCA1 | c.3375_3376delTC    | p.Pro1126fs    | 30 |    |         | yes | yes |
| F1004 | BRCA1 | c.3607C>T           | p.Arg1203Ter   | 57 |    |         | yes | yes |
| F1025 | BRCA1 | c.3607C>T           | p.Arg1203Ter   | 32 |    |         | yes | yes |
| F1117 | BRCA1 | c.3607C>T           | p.Arg1203Ter   | 40 |    |         | yes | yes |
| F230  | BRCA1 | c.3607C>T           | p.Arg1203Ter   | 26 | 40 | OvCa 46 | yes | yes |
| F430  | BRCA1 | c.3607C>T           | p.Arg1203Ter   | 40 |    |         | yes | yes |
| F1604 | BRCA1 | c.3607C>T           | p.Arg1203Ter   | 43 |    | OvCa 48 | yes | no  |
| F1719 | BRCA1 | c.3607C>T           | p.Arg1203Ter   | 40 |    |         | yes | yes |
| F1789 | BRCA1 | c.3607C>T           | p.Arg1203Ter   | 27 |    |         | N/A | N/A |
| F425  | BRCA1 | c.3624delA          | p.Lys1208fs    | 50 |    |         | yes | yes |
| F64   | BRCA1 | c.3624delA          | p.Lys1208fs    | 31 | 33 |         | yes | yes |
| F820  | BRCA1 | c.3624delA          | p.Lys1208fs    | 29 |    |         | yes | yes |
| F2618 | BRCA1 | c.3700_3704delGTAAA | p.Val1234fs    | 53 |    |         | yes | no  |
| F393  | BRCA1 | c.3700_3704delGTAAA | p.Val1234fs    | 42 |    |         | yes | N/A |
| F699  | BRCA1 | c.3700_3704delGTAAA | p.Val1234fs    | 42 | 43 | OvCa 45 | yes | no  |
| F749  | BRCA1 | c.3700_3704delGTAAA | p.Val1234fs    | 33 |    |         | yes | yes |
| F1008 | BRCA1 | c.3755_3758delTGTC  | p.Ser1253fs    | 38 |    |         | yes | yes |
| F2523 | BRCA1 | c.3755_3758delTGTC  | p.Ser1253fs    | 45 |    |         | yes | no  |
| F914  | BRCA1 | c.3756_3759delGTCT  | p.Ser1253fs    | 50 |    |         | yes | no  |
| F1507 | BRCA1 | c.4065_4068delTCAA  | p.Asn1355fs    | 31 |    |         | yes | yes |
| F824  | BRCA1 | c.4168_4169delTG    | p.Ser1389fs    | 33 |    |         | yes | yes |
| F1393 | BRCA1 | c.4205delA          | p.His1402fs    | 41 | 41 | OvCa 50 | yes | no  |

|       |       |                        |                            |    |          |         |     |     |
|-------|-------|------------------------|----------------------------|----|----------|---------|-----|-----|
| F1675 | BRCA1 | c.4327C>T              | p.Arg1443Ter               | 29 | 36       |         | yes | yes |
| F2099 | BRCA1 | c.4327C>T              | p.Arg1443Ter               | 29 | 56       |         | yes | yes |
| F2196 | BRCA1 | c.4327C>T              | p.Arg1443Ter               | 42 |          |         | yes | no  |
| F518  | BRCA1 | c.4391_4393delCTAinsTT | p.Pro1464fs                | 39 |          |         | yes | yes |
| F1127 | BRCA1 | c.4391_4393delCTAinsTT | p.Pro1464fs                | 36 |          | OvCa 41 | yes | yes |
| F678  | BRCA1 | c.4576G>T              | p.Glu1526Ter               | 30 |          |         | yes | yes |
| F1861 | BRCA1 | c.4964_4982del19       | p.Ser1655fs                | 59 |          | OvCa 57 | yes | yes |
| F1660 | BRCA1 | c.5030_5033delCTAA     | p.Thr1677fs                | 53 |          |         | yes | yes |
| F2404 | BRCA1 | c.5075-1G>A            | p.Asp1692_Trp1718delinsGly | 47 | 52       |         | yes | yes |
| F1045 | BRCA1 | c.5212G>A              | p.Gly1738Arg               | 33 |          |         | no  | yes |
| F1150 | BRCA1 | c.5212G>A              | p.Gly1738Arg               | 35 |          |         | no  | yes |
| F125  | BRCA1 | c.5212G>A              | p.Gly1738Arg               | 42 |          |         | yes | yes |
| F1443 | BRCA1 | c.5212G>A              | p.Gly1738Arg               | 38 | 40       |         | yes | yes |
| F1526 | BRCA1 | c.5212G>A              | p.Gly1738Arg               | 41 |          |         | yes | yes |
| F1539 | BRCA1 | c.5212G>A              | p.Gly1738Arg               | 28 |          |         | no  | yes |
| F1652 | BRCA1 | c.5212G>A              | p.Gly1738Arg               | 26 |          |         | yes | no  |
| F1753 | BRCA1 | c.5212G>A              | p.Gly1738Arg               | 41 |          |         | yes | no  |
| F1785 | BRCA1 | c.5212G>A              | p.Gly1738Arg               | 36 | 48       |         | yes | yes |
| F193  | BRCA1 | c.5212G>A              | p.Gly1738Arg               | 62 |          |         | yes | N/A |
| F1949 | BRCA1 | c.5212G>A              | p.Gly1738Arg               | 35 |          |         | yes | no  |
| F2104 | BRCA1 | c.5212G>A              | p.Gly1738Arg               | 49 | 59       | OvCa 53 | yes | yes |
| F2202 | BRCA1 | c.5212G>A              | p.Gly1738Arg               | 51 | 59       |         | yes | yes |
| F2434 | BRCA1 | c.5212G>A              | p.Gly1738Arg               | 43 | 57       |         | yes | yes |
| F2537 | BRCA1 | c.5212G>A              | p.Gly1738Arg               | 39 |          |         | yes | yes |
| F276  | BRCA1 | c.5212G>A              | p.Gly1738Arg               | 27 |          |         | yes | N/A |
| F285  | BRCA1 | c.5212G>A              | p.Gly1738Arg               | 46 |          |         | yes | yes |
| F287  | BRCA1 | c.5212G>A              | p.Gly1738Arg               | 52 |          |         | yes | N/A |
| F373  | BRCA1 | c.5212G>A              | p.Gly1738Arg               | 39 | 47       |         | yes | no  |
| F419  | BRCA1 | c.5212G>A              | p.Gly1738Arg               | 29 |          |         | yes | N/A |
| F634  | BRCA1 | c.5212G>A              | p.Gly1738Arg               | 43 |          |         | yes | yes |
| F688  | BRCA1 | c.5212G>A              | p.Gly1738Arg               | 39 |          |         | yes | yes |
| F707  | BRCA1 | c.5212G>A              | p.Gly1738Arg               | 26 | 31,33,41 |         | yes | N/A |
| F710  | BRCA1 | c.5212G>A              | p.Gly1738Arg               | 35 | 42       |         | yes | yes |
| F739  | BRCA1 | c.5212G>A              | p.Gly1738Arg               | 24 |          |         | yes | yes |
| F750  | BRCA1 | c.5212G>A              | p.Gly1738Arg               | 34 |          |         | yes | yes |

|       |       |                     |              |    |        |          |     |     |
|-------|-------|---------------------|--------------|----|--------|----------|-----|-----|
| F85   | BRCA1 | c.5212G>A           | p.Gly1738Arg | 36 | 45     | PanCa 54 | yes | no  |
| F909  | BRCA1 | c.5212G>A           | p.Gly1738Arg | 39 |        | CRC 40   | yes | no  |
| F1420 | BRCA1 | c.5246C>G           | p.Pro1749Arg | 27 |        |          | yes | yes |
| F1142 | BRCA1 | c.5251C>T           | p.Arg1751Ter | 42 |        |          | yes | yes |
| F1198 | BRCA1 | c.5251C>T           | p.Arg1751Ter | 30 |        |          | yes | yes |
| F1463 | BRCA1 | c.5251C>T           | p.Arg1751Ter | 46 |        |          | yes | yes |
| F1687 | BRCA1 | c.5251C>T           | p.Arg1751Ter | 25 |        |          | yes | yes |
| F189  | BRCA1 | c.5251C>T           | p.Arg1751Ter | 41 |        | OvCa 42  | yes | yes |
| F2229 | BRCA1 | c.5251C>T           | p.Arg1751Ter | 32 |        |          | yes | yes |
| F2754 | BRCA1 | c.5251C>T           | p.Arg1751Ter | 30 |        |          | yes | yes |
| F2816 | BRCA1 | c.5251C>T           | p.Arg1751Ter | 41 |        |          | yes | yes |
| F298  | BRCA1 | c.5251C>T           | p.Arg1751Ter | 30 |        | OvCa 40  | yes | yes |
| F601  | BRCA1 | c.5251C>T           | p.Arg1751Ter | 47 |        |          | yes | N/A |
| F737  | BRCA1 | c.5251C>T           | p.Arg1751Ter | 45 |        |          | yes | yes |
| F1024 | BRCA1 | c.5256_5278-2757del | p.Arg1753fs  | 46 |        | OvCa 48  | yes | yes |
| F1042 | BRCA1 | c.5256_5278-2757del | p.Arg1753fs  | 33 | 41, 49 |          | yes | yes |
| F1160 | BRCA1 | c.5256_5278-2757del | p.Arg1753fs  | 33 |        |          | yes | yes |
| F1270 | BRCA1 | c.5256_5278-2757del | p.Arg1753fs  | 48 |        | OvCa 43  | yes | yes |
| F1486 | BRCA1 | c.5256_5278-2757del | p.Arg1753fs  | 44 | 59     |          | yes | yes |
| F2057 | BRCA1 | c.5256_5278-2757del | p.Arg1753fs  | 40 |        | OvCa 59  | yes | no  |
| F2091 | BRCA1 | c.5256_5278-2757del | p.Arg1753fs  | 47 |        | OvCa 62  | yes | yes |
| F2798 | BRCA1 | c.5256_5278-2757del | p.Arg1753fs  | 43 |        |          | yes | yes |
| F428  | BRCA1 | c.5256_5278-2757del | p.Arg1753fs  | 57 |        | OvCa 55  | yes | N/A |
| F582  | BRCA1 | c.5256_5278-2757del | p.Arg1753fs  | 29 |        |          | yes | no  |
| F698  | BRCA1 | c.5256_5278-2757del | p.Arg1753fs  | 38 | 42     | OvCa 48  | yes | N/A |
| F725  | BRCA1 | c.5256_5278-2757del | p.Arg1753fs  | 40 |        | OvCa 52  | yes | yes |
| F817  | BRCA1 | c.5256_5278-2757del | p.Arg1753fs  | 34 |        |          | yes | no  |
| F937  | BRCA1 | c.5256_5278-2757del | p.Arg1753fs  | 38 |        |          | yes | yes |
| F113  | BRCA1 | c.5266dupC          | p.Gln1756fs  | 39 |        |          | yes | yes |
| F1147 | BRCA1 | c.5266dupC          | p.Gln1756fs  | 59 |        | OvCa 61  | yes | yes |
| F1159 | BRCA1 | c.5266dupC          | p.Gln1756fs  | 35 |        |          | yes | no  |
| F1228 | BRCA1 | c.5266dupC          | p.Gln1756fs  | 34 |        |          | yes | N/A |
| F1236 | BRCA1 | c.5266dupC          | p.Gln1756fs  | 36 | 46     |          | yes | yes |
| F125  | BRCA1 | c.5266dupC          | p.Gln1756fs  | 42 | 49     |          | yes | yes |
| F1466 | BRCA1 | c.5266dupC          | p.Gln1756fs  | 44 |        |          | yes | no  |

|       |       |            |             |    |    |         |     |
|-------|-------|------------|-------------|----|----|---------|-----|
| F1480 | BRCA1 | c.5266dupC | p.Gln1756fs | 39 |    | yes     | yes |
| F1581 | BRCA1 | c.5266dupC | p.Gln1756fs | 59 | 68 | yes     | yes |
| F1627 | BRCA1 | c.5266dupC | p.Gln1756fs | 35 | 56 | yes     | yes |
| F1648 | BRCA1 | c.5266dupC | p.Gln1756fs | 32 |    | yes     | yes |
| F172  | BRCA1 | c.5266dupC | p.Gln1756fs | 59 |    | yes     | no  |
| F177  | BRCA1 | c.5266dupC | p.Gln1756fs | 41 |    | yes     | yes |
| F1776 | BRCA1 | c.5266dupC | p.Gln1756fs | 42 |    | OvCa 49 | yes |
| F1792 | BRCA1 | c.5266dupC | p.Gln1756fs | 30 |    | N/A     | yes |
| F180  | BRCA1 | c.5266dupC | p.Gln1756fs | 47 |    | yes     | yes |
| F1848 | BRCA1 | c.5266dupC | p.Gln1756fs | 40 |    | yes     | yes |
| F1862 | BRCA1 | c.5266dupC | p.Gln1756fs | 28 |    | yes     | no  |
| F1883 | BRCA1 | c.5266dupC | p.Gln1756fs | 31 |    | yes     | no  |
| F1947 | BRCA1 | c.5266dupC | p.Gln1756fs | 43 |    | yes     | yes |
| F198  | BRCA1 | c.5266dupC | p.Gln1756fs | 35 |    | yes     | no  |
| F2024 | BRCA1 | c.5266dupC | p.Gln1756fs | 62 |    | OvCa 50 | yes |
| F2082 | BRCA1 | c.5266dupC | p.Gln1756fs | 34 |    | yes     | yes |
| F2292 | BRCA1 | c.5266dupC | p.Gln1756fs | 48 |    | yes     | yes |
| F2323 | BRCA1 | c.5266dupC | p.Gln1756fs | 35 |    | yes     | no  |
| F2415 | BRCA1 | c.5266dupC | p.Gln1756fs | 42 | 61 | yes     | yes |
| F2590 | BRCA1 | c.5266dupC | p.Gln1756fs | 30 |    | N/A     | yes |
| F2714 | BRCA1 | c.5266dupC | p.Gln1756fs | 30 |    | yes     | yes |
| F2765 | BRCA1 | c.5266dupC | p.Gln1756fs | 49 |    | yes     | yes |
| F2960 | BRCA1 | c.5266dupC | p.Gln1756fs | 31 | 34 | yes     | yes |
| F363  | BRCA1 | c.5266dupC | p.Gln1756fs | 34 |    | yes     | no  |
| F364  | BRCA1 | c.5266dupC | p.Gln1756fs | 33 |    | yes     | no  |
| F365  | BRCA1 | c.5266dupC | p.Gln1756fs | 33 |    | yes     | yes |
| F366  | BRCA1 | c.5266dupC | p.Gln1756fs | 35 |    | yes     | yes |
| F369  | BRCA1 | c.5266dupC | p.Gln1756fs | 36 | 36 | yes     | yes |
| F370  | BRCA1 | c.5266dupC | p.Gln1756fs | 58 |    | yes     | yes |
| F371  | BRCA1 | c.5266dupC | p.Gln1756fs | 31 |    | yes     | no  |
| F387  | BRCA1 | c.5266dupC | p.Gln1756fs | 37 |    | yes     | no  |
| F454  | BRCA1 | c.5266dupC | p.Gln1756fs | 40 |    | yes     | no  |
| F572  | BRCA1 | c.5266dupC | p.Gln1756fs | 33 |    | yes     | no  |
| F578  | BRCA1 | c.5266dupC | p.Gln1756fs | 35 |    | yes     | yes |
| F579  | BRCA1 | c.5266dupC | p.Gln1756fs | 31 | 45 | yes     | yes |

|       |       |                     |                      |    |       |                    |     |     |
|-------|-------|---------------------|----------------------|----|-------|--------------------|-----|-----|
| F655  | BRCA1 | c.5266dupC          | p.Gln1756fs          | 30 |       |                    | yes | yes |
| F777  | BRCA1 | c.5266dupC          | p.Gln1756fs          | 28 |       |                    | no  | no  |
| F847  | BRCA1 | c.5266dupC          | p.Gln1756fs          | 41 | 46    | OvCa 44            | yes | no  |
| F887  | BRCA1 | c.5266dupC          | p.Gln1756fs          | 33 |       |                    | yes | no  |
| F890  | BRCA1 | c.5266dupC          | p.Gln1756fs          | 45 |       |                    | yes | no  |
| F933  | BRCA1 | c.5266dupC          | p.Gln1756fs          | 29 |       |                    | yes | yes |
| F963  | BRCA1 | c.5266dupC          | p.Gln1756fs          | 40 |       |                    | yes | no  |
| F97   | BRCA1 | c.5266dupC          | p.Gln1756fs          | 35 |       |                    | yes | no  |
| F1343 | BRCA1 | c.5278-1G>T         | p.Phe1761fs          | 30 |       |                    | yes | no  |
| F553  | BRCA1 | c.5328delC          | p.Thr1777fs          | 32 |       |                    | yes | yes |
| F968  | BRCA1 | c.5406+5G>T         | p.Asp1778fs          | 31 |       |                    | N/A | yes |
| F1036 | BRCA1 | c.5406+664_*8273del | p.Gly1803_Tyr1863del | 51 | 56    | OvCa 51            | yes | yes |
| F1073 | BRCA1 | c.5406+664_*8273del | p.Gly1803_Tyr1863del | 45 | 48    |                    | yes | yes |
| F1103 | BRCA1 | c.5406+664_*8273del | p.Gly1803_Tyr1863del | 36 |       |                    | yes | yes |
| F1514 | BRCA1 | c.5406+664_*8273del | p.Gly1803_Tyr1863del | 33 | 40    |                    | yes | yes |
| F1576 | BRCA1 | c.5406+664_*8273del | p.Gly1803_Tyr1863del | 43 | 43    | OvCa 49 & PhaCa 57 | yes | no  |
| F1713 | BRCA1 | c.5406+664_*8273del | p.Gly1803_Tyr1863del | 48 |       |                    | yes | N/A |
| F1796 | BRCA1 | c.5406+664_*8273del | p.Gly1803_Tyr1863del | 37 |       |                    | yes | yes |
| F1890 | BRCA1 | c.5406+664_*8273del | p.Gly1803_Tyr1863del | 56 | 60    | OvCa 46            | yes | no  |
| F1991 | BRCA1 | c.5406+664_*8273del | p.Gly1803_Tyr1863del | 44 | 50    | OvCa 54            | yes | yes |
| F2000 | BRCA1 | c.5406+664_*8273del | p.Gly1803_Tyr1863del | 47 |       | OvCa 67            | yes | no  |
| F2432 | BRCA1 | c.5406+664_*8273del | p.Gly1803_Tyr1863del | 31 |       |                    | yes | no  |
| F2639 | BRCA1 | c.5406+664_*8273del | p.Gly1803_Tyr1863del | 33 |       |                    | yes | yes |
| F2722 | BRCA1 | c.5406+664_*8273del | p.Gly1803_Tyr1863del | 34 |       |                    | yes | yes |
| F2740 | BRCA1 | c.5406+664_*8273del | p.Gly1803_Tyr1863del | 26 |       |                    | no  | no  |
| F2773 | BRCA1 | c.5406+664_*8273del | p.Gly1803_Tyr1863del | 35 |       | OvCa 45            | yes | yes |
| F2789 | BRCA1 | c.5406+664_*8273del | p.Gly1803_Tyr1863del | 48 |       |                    | yes | yes |
| F2887 | BRCA1 | c.5406+664_*8273del | p.Gly1803_Tyr1863del | 30 | 34    |                    | yes | yes |
| F2911 | BRCA1 | c.5406+664_*8273del | p.Gly1803_Tyr1863del | 30 | 31    |                    | no  | yes |
| F2945 | BRCA1 | c.5406+664_*8273del | p.Gly1803_Tyr1863del | 36 |       |                    | yes | yes |
| F400  | BRCA1 | c.5406+664_*8273del | p.Gly1803_Tyr1863del | 37 |       |                    | yes | yes |
| F416  | BRCA1 | c.5406+664_*8273del | p.Gly1803_Tyr1863del | 27 | 37    | OvCa 39            | yes | yes |
| F422  | BRCA1 | c.5406+664_*8273del | p.Gly1803_Tyr1863del | 33 |       |                    | yes | N/A |
| F607  | BRCA1 | c.5406+664_*8273del | p.Gly1803_Tyr1863del | 35 |       |                    | no  | N/A |
| F62   | BRCA1 | c.5406+664_*8273del | p.Gly1803_Tyr1863del | 29 | 40,45 |                    | yes | no  |

|       |       |                             |                      |    |       |          |     |     |
|-------|-------|-----------------------------|----------------------|----|-------|----------|-----|-----|
| F661  | BRCA1 | c.5406+664_*8273del         | p.Gly1803_Tyr1863del | 47 | 60    | OvCa 67  | yes | N/A |
| F686  | BRCA1 | c.5406+664_*8273del         | p.Gly1803_Tyr1863del | 28 |       |          | yes | yes |
| F795  | BRCA1 | c.5406+664_*8273del         | p.Gly1803_Tyr1863del | 33 |       |          | yes | yes |
| F851  | BRCA1 | c.5406+664_*8273del         | p.Gly1803_Tyr1863del | 26 |       |          | yes | no  |
| F891  | BRCA1 | c.5406+664_*8273del         | p.Gly1803_Tyr1863del | 46 |       |          | yes | no  |
| F902  | BRCA1 | c.5406+664_*8273del         | p.Gly1803_Tyr1863del | 33 |       |          | yes | no  |
| F930  | BRCA1 | c.5406+664_*8273del         | p.Gly1803_Tyr1863del | 56 |       |          | yes | yes |
| F942  | BRCA1 | c.5406+664_*8273del         | p.Gly1803_Tyr1863del | 50 | 50    |          | yes | yes |
| F976  | BRCA1 | c.5406+664_*8273del         | p.Gly1803_Tyr1863del | 29 |       |          | yes | yes |
| F1413 | BRCA1 | c.5425G>T                   | p.Val1809Phe         | 65 |       | EndCa 70 | yes | yes |
| F500  | BRCA1 | c.5431C>T                   | p.Gln1811Ter         | 29 |       |          | yes | yes |
| F757  | BRCA1 | c.5431C>T                   | p.Gln1811Ter         | 30 | 30    |          | yes | yes |
| F2751 | BRCA1 | c.5431C>T                   | p.Gln1811Ter         | 32 | 40    |          | yes | yes |
| F2002 | BRCA1 | c.5434C>G                   | p.Gly1803_Ala1813del | 38 |       | OvCa 42  | yes | no  |
| F155  | BRCA1 | c.5467G>A                   | p.Gly1803_Ala1813del | 40 |       | OvCa 53  | yes | no  |
| F178  | BRCA1 | c.5467G>A                   | p.Gly1803_Ala1813del | 27 | 43    |          | yes | yes |
| F1829 | BRCA1 | c.5467G>A                   | p.Gly1803_Ala1813del | 36 |       |          | yes | N/A |
| F2060 | BRCA1 | c.5467G>A                   | p.Gly1803_Ala1813del | 46 |       | OvCa 46  | yes | no  |
| F2422 | BRCA1 | c.5467G>A                   | p.Gly1803_Ala1813del | 33 |       |          | yes | yes |
| F2497 | BRCA1 | c.5467G>A                   | p.Gly1803_Ala1813del | 39 | 52    |          | yes | yes |
| F388  | BRCA1 | c.5467G>A                   | p.Gly1803_Ala1813del | 34 |       |          | yes | yes |
| F576  | BRCA1 | c.5467G>A                   | p.Gly1803_Ala1813del | 43 | 45,51 |          | yes | yes |
| F628  | BRCA1 | c.5467G>A                   | p.Gly1803_Ala1813del | 55 |       | CRC 55   | yes | yes |
| F1059 | BRCA1 | c.5468-285_*4019delinsCACAG | p.0                  | 29 | 35    |          | yes | yes |
| F1131 | BRCA1 | c.5468-285_*4019delinsCACAG | p.0                  | 37 | 40    |          | yes | yes |
| F1174 | BRCA1 | c.5468-285_*4019delinsCACAG | p.0                  | 61 |       | OvCa 53  | yes | N/A |
| F1278 | BRCA1 | c.5468-285_*4019delinsCACAG | p.0                  | 50 |       | OvCa 50  | yes | yes |
| F1293 | BRCA1 | c.5468-285_*4019delinsCACAG | p.0                  | 33 |       |          | yes | yes |
| F1523 | BRCA1 | c.5468-285_*4019delinsCACAG | p.0                  | 37 |       |          | yes | yes |
| F1563 | BRCA1 | c.5468-285_*4019delinsCACAG | p.0                  | 43 |       |          | yes | no  |
| F1889 | BRCA1 | c.5468-285_*4019delinsCACAG | p.0                  | 38 | 40    | OvCa 44  | yes | yes |
| F196  | BRCA1 | c.5468-285_*4019delinsCACAG | p.0                  | 37 |       |          | yes | yes |
| F2068 | BRCA1 | c.5468-285_*4019delinsCACAG | p.0                  | 34 |       |          | yes | yes |
| F2125 | BRCA1 | c.5468-285_*4019delinsCACAG | p.0                  | 49 |       |          | yes | yes |
| F2405 | BRCA1 | c.5468-285_*4019delinsCACAG | p.0                  | 33 |       |          | yes | yes |

|       |       |                             |              |    |    |                    |     |     |
|-------|-------|-----------------------------|--------------|----|----|--------------------|-----|-----|
| F2587 | BRCA1 | c.5468-285_*4019delinsCACAG | p.0          | 39 |    |                    | yes | yes |
| F284  | BRCA1 | c.5468-285_*4019delinsCACAG | p.0          | 53 |    | OvCa 52            | yes | N/A |
| F332  | BRCA1 | c.5468-285_*4019delinsCACAG | p.0          | 28 | 43 | OvCa 33 & EndCa 38 | yes | yes |
| F382  | BRCA1 | c.5468-285_*4019delinsCACAG | p.0          | 29 |    |                    | yes | yes |
| F442  | BRCA1 | c.5468-285_*4019delinsCACAG | p.0          | 38 |    |                    | yes | yes |
| F514  | BRCA1 | c.5468-285_*4019delinsCACAG | p.0          | 33 |    |                    | yes | yes |
| F567  | BRCA1 | c.5468-285_*4019delinsCACAG | p.0          | 29 | 29 |                    | yes | yes |
| F736  | BRCA1 | c.5468-285_*4019delinsCACAG | p.0          | 28 |    |                    | yes | yes |
| F764  | BRCA1 | c.5468-285_*4019delinsCACAG | p.0          | 33 | 44 |                    | yes | yes |
| F2054 | BRCA1 | c.5492delC                  | p.Pro1831fs  | 41 |    |                    | yes | no  |
| F2430 | BRCA1 | c.5492delC                  | p.Pro1831fs  | 52 |    | VaCa 76            | yes | no  |
| F2803 | BRCA1 | c.5492delC                  | p.Pro1831fs  | 50 | 62 |                    | yes | no  |
| F2825 | BRCA1 | c.5492delC                  | p.Pro1831fs  | 42 |    |                    | yes | no  |
| F782  | BRCA1 | c.5492delC                  | p.Pro1831fs  | 29 |    |                    | yes | no  |
| F1294 | BRCA1 | c.5497G>A                   | p.Val1833Met | 33 |    |                    | yes | yes |
| F1434 | BRCA1 | c.5497G>A                   | p.Val1833Met | 45 |    | OvCa 74            | yes | no  |
| F1439 | BRCA1 | c.5497G>A                   | p.Val1833Met | 43 |    |                    | yes | no  |
| F1460 | BRCA1 | c.5497G>A                   | p.Val1833Met | 27 |    |                    | yes | yes |
| F1967 | BRCA1 | c.5497G>A                   | p.Val1833Met | 49 |    |                    | yes | yes |
| F2107 | BRCA1 | c.5497G>A                   | p.Val1833Met | 52 |    | OvCa 59            | yes | yes |
| F2164 | BRCA1 | c.5497G>A                   | p.Val1833Met | 38 |    |                    | yes | yes |
| F2233 | BRCA1 | c.5497G>A                   | p.Val1833Met | 33 |    |                    | yes | no  |
| F2596 | BRCA1 | c.5497G>A                   | p.Val1833Met | 38 |    |                    | yes | yes |
| F636  | BRCA1 | c.5497G>A                   | p.Val1833Met | 66 |    |                    | yes | yes |
| F649  | BRCA1 | c.5497G>A                   | p.Val1833Met | 51 |    |                    | yes | no  |
| F1761 | BRCA1 | c.5503C>T                   | p.Arg1835Ter | 39 | 54 |                    | yes | yes |
| F2566 | BRCA1 | c.5533dupT                  | p.Tyr1845fs  | 33 |    |                    | no  | yes |
| F681  | BRCA1 | c.5556_5560delCTACC         | p.Tyr1853fs  | 37 |    |                    | yes | no  |
| F897  | BRCA2 | c.-806G>A                   | p.?          | 41 |    |                    | yes | no  |
| F335  | BRCA2 | c.10G>T                     | p.Gly4Ter    | 56 |    |                    | yes | N/A |
| F1516 | BRCA2 | c.537dupT                   | p.Ile180fs   | 41 |    |                    | yes | no  |
| F1596 | BRCA2 | c.537dupT                   | p.Ile180fs   | 42 |    |                    | yes | no  |
| F1111 | BRCA2 | c.658_659delGT              | p.Val220fs   | 38 |    |                    | yes | no  |
| F549  | BRCA2 | c.658_659delGT              | p.Val220fs   | 48 |    | CRC 48, OvCa 50    | yes | N/A |
| F2669 | BRCA2 | c.682-1G>T                  | p.?          | 44 | 82 |                    | yes | no  |



|       |       |                           |                |    |    |         |     |     |
|-------|-------|---------------------------|----------------|----|----|---------|-----|-----|
| F1481 | BRCA2 | c.1405_1406delGA          | p.Asp469Terfs  | 40 |    |         | yes | no  |
| F2215 | BRCA2 | c.1405_1406delGA          | p.Asp469Terfs  | 34 |    |         | no  | yes |
| F753  | BRCA2 | c.1405_1406delGA          | p.Asp469Terfs  | 43 |    |         | yes | no  |
| F2799 | BRCA2 | c.1117C>T                 | p.Gln373Ter    | 71 |    | CRC 57  | yes | no  |
| F2809 | BRCA2 | c.1532C>A                 | p.Ser511Ter    | 45 | 47 |         | yes | no  |
| F1292 | BRCA2 | c.1813dupA                | p.Ile605fs     | 33 |    |         | yes | no  |
| F1597 | BRCA2 | c.2339C>G                 | p.Ser780Ter    | 31 | 36 |         | yes | no  |
| F1817 | BRCA2 | c.2339C>G                 | p.Ser780Ter    | 52 |    |         | yes | no  |
| F801  | BRCA2 | c.2339C>G                 | p.Ser780Ter    | 33 |    |         | yes | yes |
| F2117 | BRCA2 | c.2490_2491insT           | p.Val831fs     | 45 |    |         | yes | yes |
| F1546 | BRCA2 | c.2808_2811delACAA        | p.Ala938fs     | 34 | 55 |         | yes | no  |
| F2477 | BRCA2 | c.2808_2811delACAA        | p.Ala938fs     | 62 |    |         | yes | no  |
| F2599 | BRCA2 | c.2808_2811delACAA        | p.Ala938fs     | 37 |    |         | yes | yes |
| F2908 | BRCA2 | c.2808_2811delACAA        | p.Ala938fs     | 40 |    |         | yes | no  |
| F1688 | BRCA2 | c.3554_3563delCAGTTGAAAT  | p.Thr1185fs    | 43 |    |         | yes | no  |
| F349  | BRCA2 | c.3554_3563delCAGTTGAAAT  | p.Thr1185fs    | 33 |    |         | N/A | no  |
| F1743 | BRCA2 | c.3865_3868delAAAT        | p.Lys1289fs    | 42 |    |         | yes | no  |
| F135  | BRCA2 | c.4409_4410delTA          | p.Ile1470fs    | 28 |    |         | no  | no  |
| F1850 | BRCA2 | c.4415_4418delAGAA        | p.Lys1472fs    | 32 |    |         | yes | no  |
| F1204 | BRCA2 | c.4415_4418delAGAA        | p.Lys1472fs    | 42 |    |         | yes | no  |
| F2582 | BRCA2 | c.4415_4418delAGAA        | p.Lys1472fs    | 45 |    |         | yes | yes |
| F967  | BRCA2 | c.4415_4418delAGAA        | p.Lys1472fs    | 30 | 42 |         | yes | yes |
| F934  | BRCA2 | c.4515_4525delCTTCCAGGGAC | p.Phe1506fs    | 54 |    | OvCa 53 | yes | no  |
| F2458 | BRCA2 | c.4530delC                | p.Glu1511fs    | 32 | 32 |         | yes | no  |
| F591  | BRCA2 | c.4530delC                | p.Glu1511fs    | 46 | 60 |         | yes | no  |
| F2716 | BRCA2 | c.4530delC                | p.Glu1511fs    | 39 |    |         | yes | no  |
| F1802 | BRCA2 | c.4654_4657delGGTA        | p.Glu1552fs    | 38 |    |         | yes | yes |
| F427  | BRCA2 | c.4769delA                | p.Lys1590fs    | 38 | 42 |         | yes | no  |
| F435  | BRCA2 | c.4769delA                | p.Lys1590fs    | 43 |    |         | yes | no  |
| F478  | BRCA2 | c.4769delA                | p.Lys1590fs    | 32 |    |         | N/A | no  |
| F2548 | BRCA2 | c.5110_5113delAGAA        | p.Arg1704Terfs | 35 |    |         | yes | no  |
| F642  | BRCA2 | c.5349_5351delAAA         | p.Lys1783del   | 25 | 48 |         | yes | no  |
| F2046 | BRCA2 | c.5645C>A                 | p.Ser1882Ter   | 53 |    | OvCa 63 | yes | yes |
| F2264 | BRCA2 | c.5645C>A                 | p.Ser1882Ter   | 28 |    |         | yes | no  |
| F653  | BRCA2 | c.5722_5723delCT          | p.Leu1908fs    | 49 |    |         | yes | no  |

|       |       |                     |                      |    |    |         |     |     |
|-------|-------|---------------------|----------------------|----|----|---------|-----|-----|
| F1525 | BRCA2 | c.5791C>T           | p.Gln1931Ter         | 49 |    |         | yes | no  |
| F2535 | BRCA2 | c.6037A>T           | p.Lys2013Ter         | 58 | 63 |         | yes | no  |
| F969  | BRCA2 | c.6490C>T           | p.Gln2164Ter         | 42 |    |         | yes | no  |
| F1002 | BRCA2 | c.6600_6601delTT    | p.Ser2201Terfs       | 41 |    |         | yes | no  |
| F2890 | BRCA2 | c.6771delC          | p.Glu2258fs          | 37 | 45 |         | yes | no  |
| F1572 | BRCA2 | c.6842_7007del6421  | p.Gly2281fs          | 49 | 57 |         | yes | no  |
| F903  | BRCA2 | c.6842_7007del6421  | p.Gly2281fs          | 25 |    |         | yes | no  |
| F943  | BRCA2 | c.6842_7007del6421  | p.Gly2281fs          | 47 |    | OvCa 56 | yes | no  |
| F980  | BRCA2 | c.6842_7007del6421  | p.Gly2281fs          | 36 | 36 |         | yes | no  |
| F1972 | BRCA2 | c.6941delC          | p.Thr2314fs          | 62 |    | OvCa 54 | yes | no  |
| F2199 | BRCA2 | c.6941delC          | p.Thr2314fs          | 38 |    | OvCa 37 | yes | no  |
| F852  | BRCA2 | c.6941delC          | p.Thr2314fs          | 27 |    |         | yes | no  |
| F2763 | BRCA2 | c.7007G>A           | p.Gly2313fs          | 44 | 44 |         | yes | no  |
| F1251 | BRCA2 | c.7363delC          | p.His2455fs          | 35 |    |         | yes | no  |
| F1284 | BRCA2 | c.7806-2A>T         | p.Ala2603_Arg2659del | 38 | 41 |         | yes | no  |
| F2483 | BRCA2 | c.7806-2A>T         | p.Ala2603_Arg2659del | 37 |    |         | yes | no  |
| F2558 | BRCA2 | c.7806-2A>T         | p.Ala2603_Arg2659del | 58 |    |         | yes | no  |
| F560  | BRCA2 | c.7806-2A>T         | p.Ala2603_Arg2659del | 31 |    |         | yes | no  |
| F1098 | BRCA2 | c.7879A>T           | p.Ile2627Phe         | 41 |    |         | yes | no  |
| F720  | BRCA2 | c.7879A>T           | p.Ile2627Phe         | 45 |    |         | yes | no  |
| F1217 | BRCA2 | c.7913_7917delTTCCT | p.Phe2638Terfs       | 38 |    |         | yes | yes |
| F1210 | BRCA2 | c.7976G>A           | p.Ala2603_Arg2659del | 45 |    |         | yes | no  |
| F1301 | BRCA2 | c.7976G>A           | p.Ala2603_Arg2659del | 35 | 35 |         | yes | no  |
| F1316 | BRCA2 | c.7976G>A           | p.Ala2603_Arg2659del | 56 |    |         | yes | no  |
| F1124 | BRCA2 | c.8364G>A           | p.Trp2788Ter         | 43 |    |         | yes | no  |
| F2468 | BRCA2 | c.8364G>A           | p.Trp2788Ter         | 53 |    | OvCa 56 | yes | no  |
| F1763 | BRCA2 | c.8546delA          | p.Lys2849fs          | 37 |    |         | yes | no  |
| F1698 | BRCA2 | c.8592delC          | p.Leu2865fs          | 47 |    |         | yes | no  |
| F2715 | BRCA2 | c.8754+1G>A         | p.Glu2918fs          | 44 |    |         | yes | no  |
| F537  | BRCA2 | c.8800delC          | p.Gln2934fs          | 39 | 55 |         | yes | no  |
| F1069 | BRCA2 | c.8930delA          | p.Tyr2977fs          | 41 | 41 |         | yes | no  |
| F465  | BRCA2 | c.8993_9024del32    | p.Ser2998fs          | 28 |    |         | N/A | N/A |
| F2354 | BRCA2 | c.9016_9017delTA    | p.Tyr3006fs          | 41 |    |         | yes | no  |
| F989  | BRCA2 | c.9097dupA          | p.Thr3033fs          | 33 |    |         | yes | no  |
| F2420 | BRCA2 | c.9246_9247insA     | p.Thr3085fs          | 29 | 44 |         | yes | no  |

|       |               |                      |                      |    |    |         |     |     |
|-------|---------------|----------------------|----------------------|----|----|---------|-----|-----|
| F666  | <i>BRCA2</i>  | c.9376C>T            | p.Gln3126Ter         | 47 |    |         | yes | no  |
| F160  | <i>BRCA2</i>  | c.9382C>T            | p.Arg3128Ter         | 29 |    |         | yes | N/A |
| F1433 | <i>BRCA2</i>  | c.9501+1 G>A         | p.Gly3086_Gly3167del | 36 |    |         | yes | no  |
| F1981 | <i>BRCA2</i>  | c.9501+1 G>A         | p.Gly3086_Gly3167del | 39 |    |         | yes | no  |
| F2028 | <i>BRCA2</i>  | c.9501+1 G>A         | p.Gly3086_Gly3167del | 32 |    |         | yes | no  |
| F1741 | <i>BRIP1</i>  | c.2786_2789delTATC   | p.Leu929fs           | 40 |    |         | yes | no  |
| F1473 | <i>BRIP1</i>  | c.2947delA           | p.Ile983fs           | 29 |    |         | yes | no  |
| F2189 | <i>CDKN2A</i> | c.71G>C              | p.Arg24Pro           | 36 |    |         | yes | yes |
| F876  | <i>CHEK2</i>  | c.(?-1900)(?-1-1)del | p.?                  | 47 | 56 |         | yes | N/A |
| F993  | <i>CHEK2</i>  | c.100C>T             | p.Glu34Ter           | 47 |    |         | yes | no  |
| F1081 | <i>CHEK2</i>  | c.320_592del6160     | p.Glu107_Lys197del   | 36 |    |         | no  | no  |
| F124  | <i>CHEK2</i>  | c.475T>C             | p.Tyr159His          | 30 |    |         | no  | no  |
| F259  | <i>CHEK2</i>  | c.475T>C             | p.Tyr159His          | 57 |    |         | yes | N/A |
| F508  | <i>CHEK2</i>  | c.480_481insAAA      | p.Glu161fs           | 39 | 58 |         | yes | yes |
| F2050 | <i>CHEK2</i>  | c.499G>A             | p.Gly167Arg          | 46 |    |         | yes | no  |
| F2469 | <i>CHEK2</i>  | c.499G>A             | p.Gly167Arg          | 35 |    |         | yes | no  |
| F667  | <i>CHEK2</i>  | c.499G>A             | p.Gly167Arg          | 34 |    |         | yes | no  |
| F2305 | <i>CHEK2</i>  | c.507delT            | p.Phe169fs           | 41 |    |         | yes | no  |
| F322  | <i>CHEK2</i>  | c.507delT            | p.Phe169fs           | 51 | 67 |         | yes | N/A |
| F509  | <i>CHEK2</i>  | c.548T>C             | p.Leu183Ser          | 48 |    |         | yes | N/A |
| F1018 | <i>CHEK2</i>  | c.549G>C             | p.Leu183Phe          | 36 |    |         | yes | no  |
| F1327 | <i>CHEK2</i>  | c.549G>C             | p.Leu183Phe          | 31 |    |         | yes | no  |
| F1484 | <i>CHEK2</i>  | c.549G>C             | p.Leu183Phe          | 29 |    |         | yes | no  |
| F459  | <i>CHEK2</i>  | c.549G>C             | p.Leu183Phe          | 46 |    |         | yes | N/A |
| F1313 | <i>CHEK2</i>  | c.592+3A>T           | p.Glu149fs           | 50 | 52 | CRC 53  | yes | no  |
| F2482 | <i>CHEK2</i>  | c.592+3A>T           | p.Glu149fs           | 33 |    |         | yes | no  |
| F1136 | <i>CHEK2</i>  | c.793_846del7566     | p.Asp265_His282del   | 50 |    |         | yes | N/A |
| F1556 | <i>CHEK2</i>  | c.1100delC           | p.Thr367fs           | 41 | 42 |         | yes | no  |
| F2839 | <i>CHEK2</i>  | c.1188delT           | p.Val397fs           | 30 |    |         | N/A | no  |
| F802  | <i>CHEK2</i>  | c.1368dupA           | p.Glu457fs           | 48 |    |         | yes | no  |
| F2464 | <i>DICER1</i> | c.5563C>T            | p.Arg1855Ter         | 66 |    |         | yes | no  |
| F1922 | <i>ERCC3</i>  | c.325C>T             | p.Arg109Ter          | 32 |    |         | no  | yes |
| F2734 | <i>FANCD2</i> | c.2917_2918delTTC    | p.Ser973fs           | 53 |    | OvCa 56 | yes | no  |
| F2495 | <i>FANCI</i>  | c.1597C>T            | p.Arg533Ter          | 36 |    |         | yes | yes |
| F2484 | <i>FANCL</i>  | c.2T>C               | p.Met1?              | 30 |    |         | no  | no  |

|       |               |                          |                    |    |    |         |     |     |
|-------|---------------|--------------------------|--------------------|----|----|---------|-----|-----|
| F2795 | <i>FANCL</i>  | c.2T>C                   | p.Met1?            | 40 |    |         | yes | yes |
| F2717 | <i>FANCM</i>  | c.4843A>T                | p.Lys1615Ter       | 29 |    |         | yes | no  |
| F2529 | <i>FANCM</i>  | c.5314_5315delTG         | p.Cys1772Ter       | 47 |    |         | yes | no  |
| F1178 | <i>MLH1</i>   | c.1036C>T                | p.Gln346Ter        | 32 | 34 | CRC 50  | yes | no  |
| F1272 | <i>MSH6</i>   | c.3169_3170delTT         | p.Leu1057fs        | 50 | 50 |         | yes | no  |
| F643  | <i>MSH6</i>   | c.3953_3956delGAAA       | p.Arg1318fs        | 31 |    |         | no  | no  |
| F714  | <i>MSH6</i>   | c.4005_4008delAGTT       | p.Glu1335fs        | 31 |    |         | N/A | N/A |
| F258  | <i>NBN</i>    | c.657_661delACAAA        | p.Lys219fs         | 37 |    |         | yes | N/A |
| F1673 | <i>NBN</i>    | c.896+2C>T               | p.?                | 33 |    |         | yes | no  |
| F1487 | <i>NBN</i>    | c.2140C>T                | p.Arg714Ter        | 30 |    |         | yes | no  |
| F2560 | <i>NF1</i>    | c.3525_3526delAA         | p.Arg1176fs        | 31 |    |         | yes | no  |
| F1769 | <i>PALB2</i>  | c.1140_1143delTCTT       | p.Ser380fs         | 34 | 41 |         | yes | no  |
| F924  | <i>PALB2</i>  | c.1591_1600delTTGCCAACTT | p.Leu531fs         | 30 |    |         | yes | yes |
| F1309 | <i>PALB2</i>  | c.2257C>T                | p.Arg753Ter        | 58 |    |         | yes | no  |
| F1586 | <i>PALB2</i>  | c.2257C>T                | p.Arg753Ter        | 34 |    |         | yes | no  |
| F945  | <i>PALB2</i>  | c.2257C>T                | p.Arg753Ter        | 34 |    |         | yes | no  |
| F2736 | <i>PALB2</i>  | c.2747_2748+4delAGGTAA   | p.Glu916fs         | 37 | 37 |         | yes | no  |
| F2010 | <i>PALB2</i>  | c.3255dupG               | p.Arg1086fs        | 38 |    |         | yes | yes |
| F2514 | <i>PMS2</i>   | c.1261C>T                | p.Arg421Ter        | 59 |    |         | yes | no  |
| F1511 | <i>PMS2</i>   | c.1414A>T                | p.Lys472Ter        | 52 |    |         | yes | no  |
| F975  | <i>PTEN</i>   | c.424delC                | p.Arg142fs         | 30 |    |         | yes | no  |
| F775  | <i>PTEN</i>   | c.697C>T                 | p.Arg233Ter        | 35 |    |         | N/A | no  |
| F1173 | <i>RAD51C</i> | c.706-2A>C               | p.Val236_Ala279del | 40 |    |         | yes | yes |
| F2216 | <i>RAD51C</i> | c.706-2A>C               | p.Val236_Ala279del | 50 | 50 | OvCa 54 | yes | no  |
| F2322 | <i>RAD51C</i> | c.706-2A>C               | p.Val236_Ala279del | 56 |    |         | yes | no  |
| F879  | <i>RAD51C</i> | c.706-2A>C               | p.Val236_Ala279del | 37 |    |         | yes | yes |
| F2907 | <i>RAD51C</i> | c.709C>T                 | p.Arg237Ter        | 33 |    |         | yes | no  |
| F1394 | <i>RAD51C</i> | c.904+5G>T               | p.Val280_Gly302del | 44 | 44 |         | yes | yes |
| F1758 | <i>RAD51C</i> | c.904+5G>T               | p.Val280_Gly302del | 47 | 58 |         | yes | no  |
| F752  | <i>RAD51D</i> | c.451C>T                 | p.Gln151Ter        | 55 |    |         | yes | no  |
| F2247 | <i>RAD51D</i> | c.556C>T                 | p.Arg186Ter        | 43 |    |         | yes | yes |
| F1695 | <i>RAD51D</i> | c.709C>T                 | p.Arg237Ter        | 39 |    |         | yes | no  |
| F487  | <i>RAD51D</i> | c.898C>T                 | p.Arg300Ter        | 33 |    |         | yes | no  |
| F774  | <i>SDHB</i>   | c.445C>T                 | p.Gln149Ter        | 28 |    |         | no  | no  |
| F1746 | <i>SLX4</i>   | c.4089_4090delAG         | p.Asp1365fs        | 45 |    |         | yes | no  |

|       |                   |                                             |                                     |    |    |         |     |     |
|-------|-------------------|---------------------------------------------|-------------------------------------|----|----|---------|-----|-----|
| F1686 | TP53              | c.(?-17900)(?-1-1)del                       | p.?                                 | 29 |    |         | no  | no  |
| F920  | TP53              | c.324_327dupTTTC                            | p.Arg110fs                          | 20 |    |         | yes | yes |
| F329  | TP53              | c.375G>A                                    | p.Ser33_Thr125del                   | 24 | 36 | OvCa 33 | yes | no  |
| F1995 | TP53              | c.559+2T>C                                  | p.?                                 | 30 |    |         | yes | no  |
| F1966 | TP53              | c.578A>T                                    | p.His193Leu                         | 24 | 30 |         | yes | yes |
| F1359 | TP53              | c.847C>T                                    | p.Arg283Cys                         | 31 |    |         | yes | no  |
| F1963 | TP53              | c.847C>T                                    | p.Arg283Cys                         | 36 |    |         | yes | no  |
| F812  | TP53              | c.1021T>G                                   | p.Phe341Val                         | 35 | 40 |         | yes | no  |
| F543  | BRCA1 &<br>BRCA2  | c.5406+664_*8273del<br>c.9748dupT           | p.Gly1803_Tyr1863del<br>p.Ser3250fs | 31 | 49 |         | yes | yes |
| F330  | BRCA1 &<br>PALB2  | c.5497G>A<br>c.2257C>T                      | p.Val1833Met<br>p.Arg753Ter         | 44 |    |         | yes | N/A |
| F1281 | BRCA2 &<br>SDHC   | c.7879A>T<br>c.397C>T                       | p.Ile2627Phe<br>p.Arg133Ter         | 31 | 31 |         | no  | no  |
| F2070 | BRCA2 &<br>RECQL4 | c.1813dupA<br>c.1879-1G>A                   | p.Ile605fs<br>p.?                   | 46 |    | OvCa 63 | yes | no  |
| F2540 | BRCA2 &<br>RAD51C | c.2490_2491insT<br>c.904+5G>T               | p.Val831fs<br>p.Val280_Gly302del    | 46 | 56 |         | yes | no  |
| F882  | BRCA2 &<br>ATM    | c.(80+1_81-1)_(593+1_594-1)del<br>c.3576G>A | p.?<br>p.Ser1135_Lys1192del         | 40 |    |         | yes | no  |
| F2516 | ERCC3 &<br>FANCC  | c.576_583delCGTGATCC<br>c.346-1G>A          | p.Pro192fs<br>p.?                   | 34 |    |         | no  | yes |
| F2364 | PALB2 &<br>SLX4   | c.2747_2748+4delAGGTAA<br>c.4089_4090delAG  | p.Glu916fs<br>p.Asp1365fs           | 44 |    | OvCa 48 | yes | no  |
| F776  | PALB2 &<br>ATM    | c.2257C>T<br>c.1562_1563delAG               | p.Arg753Ter<br>p.Glu522fs           | 33 |    |         | yes | no  |
| F1097 | PTEN &<br>PALB2   | c.697C>T<br>c.3426dupA                      | p.Arg233Ter<br>p.Leu1143fs          | 36 |    |         | yes | no  |

Variant nomenclature was based on the following reference sequences: *ATM* NM\_000051.3; *BLM* NM\_000057.3; *BRCA1* NM\_007294.3; *BRCA2* NM\_000059.3; *BRIP1* NM\_032043.2; *CDKN2A* NM\_000077.4; *CHEK2* NM\_007194.3; *DICER1* NM\_030621.4; *ERCC3* NM\_000122.1; *FANCC* NM\_000136.2; *FANCD2* NM\_001018115.1; *FANCI* NM\_001113378.1; *FANCL* NM\_018062.3; *FANCM* NM\_020937.2; *MLH1* NM\_000249.3; *MSH6* NM\_000179.2; *NBN* NM\_002485.4; *NF1*

*NM\_001042492.2; PALB2 NM\_024675.3; PTEN NM\_000314.6; PMS2 NM\_000535.6; RAD51C NM\_058216.2; RAD51D NM\_002878.3; RECQL4 NM\_004260.3; SDHB NM\_003000.2; SDHC NM\_003001.3; SLX4 NM\_032444.2 and TP53 NM\_000546.5.*

*Abbreviations used: dx, diagnosis; TNBC, triple-negative breast cancer; FH, family history; Ca, cancer; Br, breast; Ov, ovarian; Pr, prostate; Pha, pharyngeal; End, endometrial; CRC, colorectal cancer; Pan, pancreatic; Va, ampulla of Vater; y, years and N/A, Not Available;*

*Blue color highlights individuals carrying two LoF alleles. Family history yes: at least two family relatives, irrespectively of degree and age at diagnosis, with BrCa and/or OvCa and/or PanCa.*
