# Supplementary material for: One in three highly selected Greek patients with breast cancer carries a loss-of-function variant in a cancer susceptibility gene
Source: PubMed Central journal article supplement — J Med Genet. 2019 Jul 12;57(1):53–61. doi: 10.1136/jmedgenet-2019-106189 (PMC6929701; doi:10.1136/jmedgenet-2019-106189), 2019-07-12
Supplement: jmedgenet-2019-106189supp006.pdf [file jmedgenet-2019-106189supp006.pdf]

**Supplementary Table 4.** Prevalence and Odds Ratios for breast cancer risk of LoF variants in all studied genes between selected Greek breast cancer patients and Reference Controls from ExAC and FLOSSIES.

| Gene                      | Demokritos Cases |          |       |           |          | Controls (ExAC/FLOSSIES) |          |        |              |           | Cancer Risk (ExAC/FLOSSIES) |                       |                                                  |
|---------------------------|------------------|----------|-------|-----------|----------|--------------------------|----------|--------|--------------|-----------|-----------------------------|-----------------------|--------------------------------------------------|
|                           | Truncating       | Missense | Total | Cases, No | Freq (%) | Truncating               | Missense | Total  | Controls, No | Freq (%)  | Odds Ratio                  | 95% CI                | p-value                                          |
| <i>ATM</i>                | 13               | 3        | 16    | 1355      | 1.18     | 78/14                    | 15/7     | 93/21  | 26862/7325   | 0.35/0.29 | 3.41/4.12                   | 1.87-5.86/2-8.3       | <b>6.12x10<sup>-5</sup>/2.45x10<sup>-5</sup></b> |
| <i>BLM</i>                | 1                | 0        | 1     | 1355      | 0.07     | 50/NA                    | 0/NA     | 50/NA  | 24941/NA     | 0.20/NA   | 0.37/NA                     | 0.009-2.15/NA         | 0.616/NA                                         |
| <i>BRIP1</i>              | 1                | 0        | 1     | 1355      | 0.07     | 52/11                    | 0/0      | 52/11  | 26396/7325   | 0.20/0.15 | 0.37/0.49                   | 0.009-2.19/0.01-3.39  | 0.616/0.789                                      |
| <i>CDKN2A</i>             | 0                | 1        | 1     | 1355      | 0.07     | 1/NA                     | 4/NA     | 5/NA   | 23419/NA     | 0.02/NA   | 3.46/NA                     | 0.07-30.9/NA          | 0.466/NA                                         |
| <i>CHEK2</i>              | 7                | 12       | 19    | 1355      | 1.40     | 155/28                   | 63/11    | 218/39 | 25819/7325   | 0.84/0.53 | 1.66/2.63                   | 0.98-2.67/1.44-4.68   | 0.11/ <b>0.003</b>                               |
| <i>CHEK2</i> miss         | 0                | 12       | 12    | 1355      | 0.89     | 0/0                      | 63/11    | 63/11  | 26974/7325   | 0.23/0.15 | 3.79/5.9                    | 1.86-7.12/2.38-14.78  | <b>1.2x10<sup>-3</sup>/2.45x10<sup>-4</sup></b>  |
| <i>CHEK2</i> <sup>^</sup> | NA               | 12       | 12    | 1355      | 0.89     | NA                       | 233/46   | 233/46 | 26974/7325   | 0.85/0.63 | 1.02/1.40                   | 0.52-1.83/0.67-2.69   | 0.88/0.28                                        |
| <i>DICER1</i>             | 1                | 0        | 1     | 1355      | 0.07     | 3/NA                     | 0/NA     | 3/NA   | 27171/NA     | 0.01/NA   | 6.68/NA                     | 0.13-83.28/NA         | 0.307/NA                                         |
| <i>ERCC3</i>              | 1                | 0        | 1     | 1355      | 0.07     | 63/NA                    | 0/NA     | 63/NA  | 27164/NA     | 0.23/NA   | 0.32/NA                     | 0.008-1.84/NA         | 0.539/NA                                         |
| <i>FANCC</i>              | 1                | 0        | 1     | 1355      | 0.07     | 16/NA                    | 24/NA    | 40/NA  | 26912/NA     | 0.15/NA   | 0.5/NA                      | 0.012-2.93/NA         | 0.751/NA                                         |
| <i>FANCL</i>              | 1                | 0        | 1     | 1355      | 0.07     | 16/NA                    | 0/NA     | 16/NA  | 26795/NA     | 0.06/NA   | 1.24/NA                     | 0.029-7.97/NA         | 0.642/NA                                         |
| <i>FANCM</i>              | 2                | 0        | 2     | 1355      | 0.15     | 167/40                   | 0/0      | 167/40 | 26461/7325   | 0.63/0.55 | 0.23/0.27                   | 0.03-0.86/0.03-1.04   | <b>0.044/0.072</b>                               |
| <i>MLH1</i>               | 1                | 0        | 1     | 1355      | 0.07     | 5/NA                     | 2/NA     | 7/NA   | 27157/NA     | 0.03/NA   | 2.86/NA                     | 0.06-22.31/NA         | 0.494/NA                                         |
| <i>MSH6</i>               | 3                | 0        | 3     | 1355      | 0.22     | 15/NA                    | 4/NA     | 19/NA  | 26990/NA     | 0.07/NA   | 3.14/NA                     | 0.59-10.70/NA         | 0.159/NA                                         |
| <i>NBN</i>                | 3                | 0        | 3     | 1355      | 0.22     | 17/14                    | 0/0      | 17/14  | 25479/7325   | 0.07/0.19 | 3.32/1.16                   | 0.62-11.49/0.21-4.16  | 0.155/0.789                                      |
| <i>NF1</i>                | 1                | 0        | 1     | 1355      | 0.07     | 9/NA                     | 2/NA     | 11/NA  | 25350/NA     | 0.04/NA   | 1.7/NA                      | 0.04-11.72/NA         | 0.616/NA                                         |
| <i>PALB2</i>              | 7                | 0        | 7     | 1355      | 0.52     | 17/6                     | 0/0      | 17/6   | 26435/7325   | 0.06/0.08 | 8.03/6.3                    | 2.81-20.42/1.81-22.75 | <b>7.16x10<sup>-3</sup>/0.003</b>                |
| <i>PMS2</i>               | 2                | 0        | 2     | 1355      | 0.15     | 25/NA                    | 10/NA    | 35/NA  | 25884/NA     | 0.14/NA   | 1.09/NA                     | 0.13-4.26/NA          | 0.751/NA                                         |
| <i>PTEN</i>               | 2                | 0        | 2     | 1355      | 0.15     | 1/0                      | 0/0      | 1/0    | 27173/7325   | 0.00/0.00 | 40.09/Inf                   | 2.08-2323.35/-        | <b>0.017/0.036</b>                               |
| <i>RAD51C</i>             | 5                | 2        | 7     | 1355      | 0.52     | 19/2                     | 3/1      | 22/3   | 26361/7325   | 0.08/0.04 | 6.19/12.6                   | 2.23-15.03/2.87-75.64 | <b>0.002/4.73x10<sup>-4</sup></b>                |
| <i>RAD51D</i>             | 4                | 0        | 4     | 1355      | 0.30     | 5/2                      | 0/1      | 5/3    | 26787/7325   | 0.02/0.04 | 15.81/7.2                   | 3.13-73.54/1.22-49.3  | <b>0.002/0.022</b>                               |
| <i>SLX4</i>               | 1                | 0        | 1     | 1355      | 0.07     | 36/14                    | 0/0      | 36/14  | 26862/7325   | 0.13/0.19 | 0.55/0.39                   | 0.01-3.28/0.01-2.54   | 1/0.616                                          |
| <i>TP53</i>               | 2                | 6        | 7     | 1355      | 0.52     | 1/0                      | 28/3     | 29/3   | 26889/7325   | 0.11/0.04 | 4.79/12.61                  | 1.77-11.2/2.87-75.64  | <b>0.001/4.73x10<sup>-4</sup></b>                |

Notes: CNV carriers, double LoF variant carriers and the low risk *CHEK2* variants: p.(Ile157Thr) & p.(Ser428Phe) were excluded from the analysis. ExAC data extracted were non-TCGA/non-Finnish. FLOSSIES data extracted were on European-Americans.

Abbreviations used: ExAC, Exome Aggregation Consortium; Freq, Variant Observed Frequency; miss, missense; No, number; NA, Not Applicable. <sup>^</sup>*CHEK2* p.I157T only.
