# Supplementary figures and images for: One in three highly selected Greek patients with breast cancer carries a loss-of-function variant in a cancer susceptibility gene
Source: PubMed Central journal article supplement — J Med Genet. 2019 Jul 12;57(1):53–61. doi: 10.1136/jmedgenet-2019-106189 (PMC6929701; doi:10.1136/jmedgenet-2019-106189), 2019-07-12

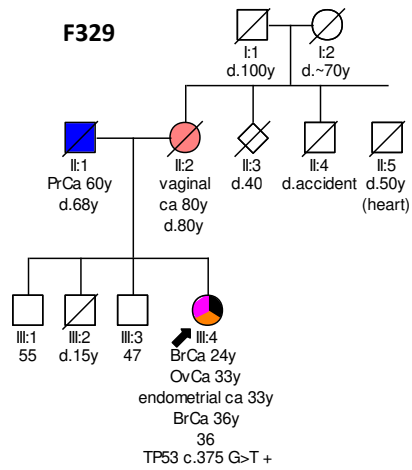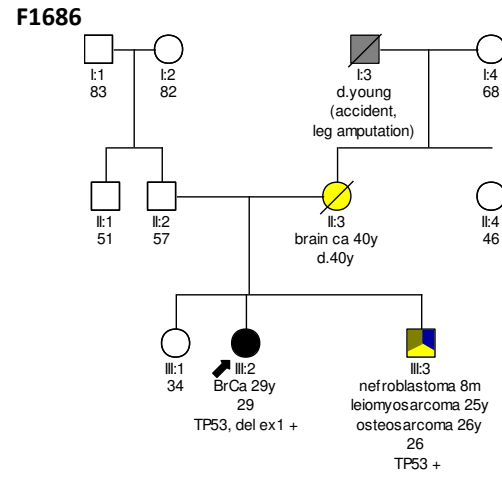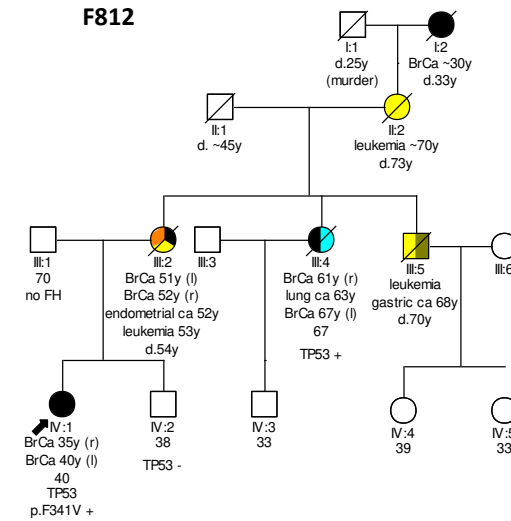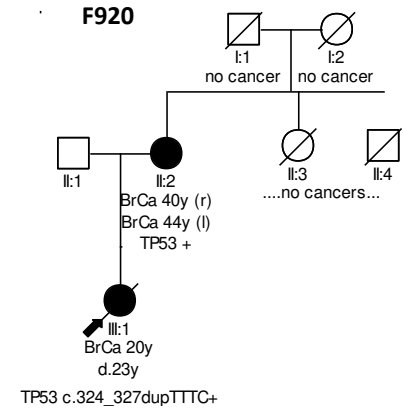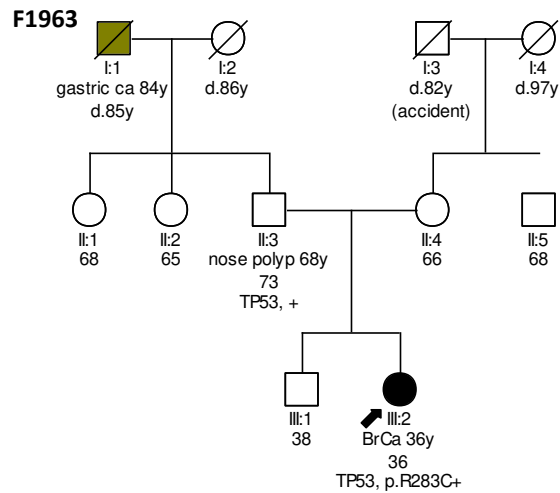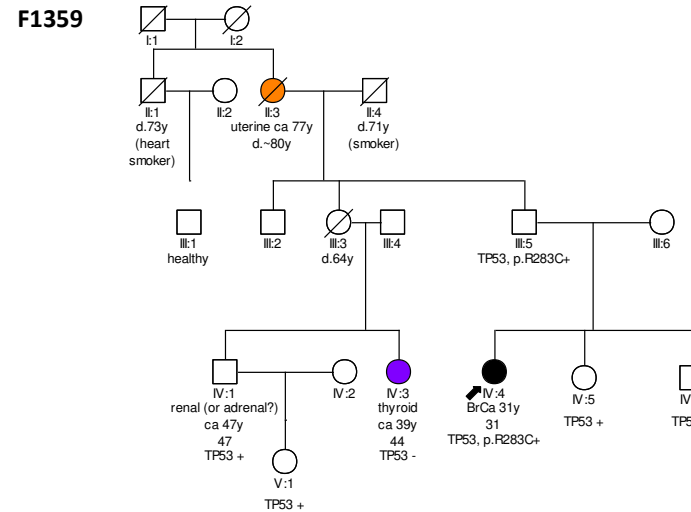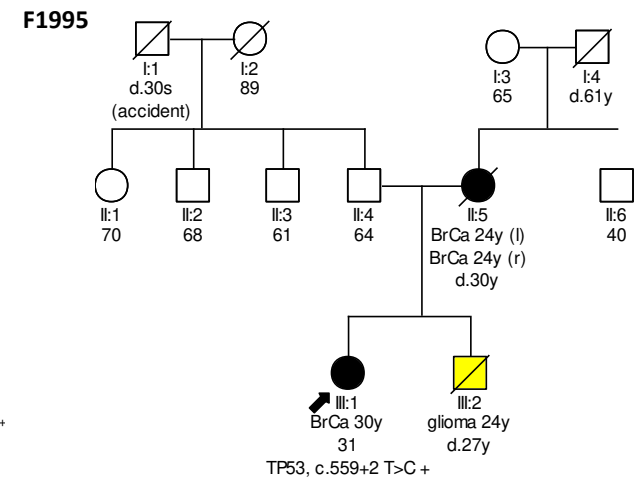

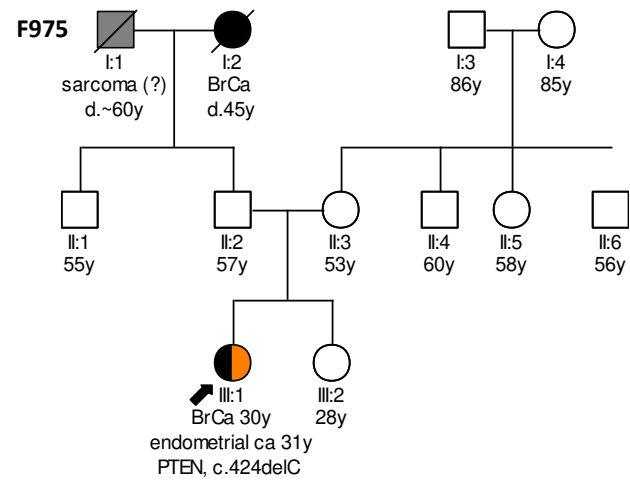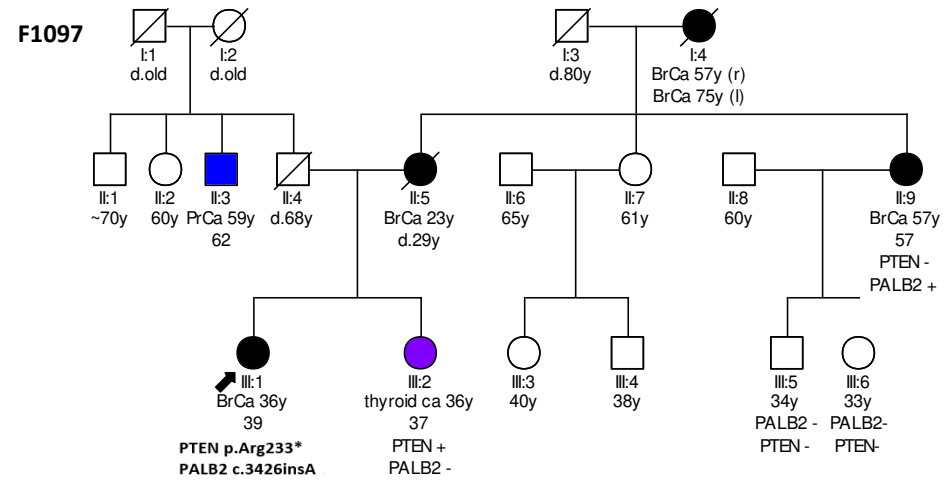

Supplement: jmedgenet-2019-106189supp001.pdf [file jmedgenet-2019-106189supp001.pdf]

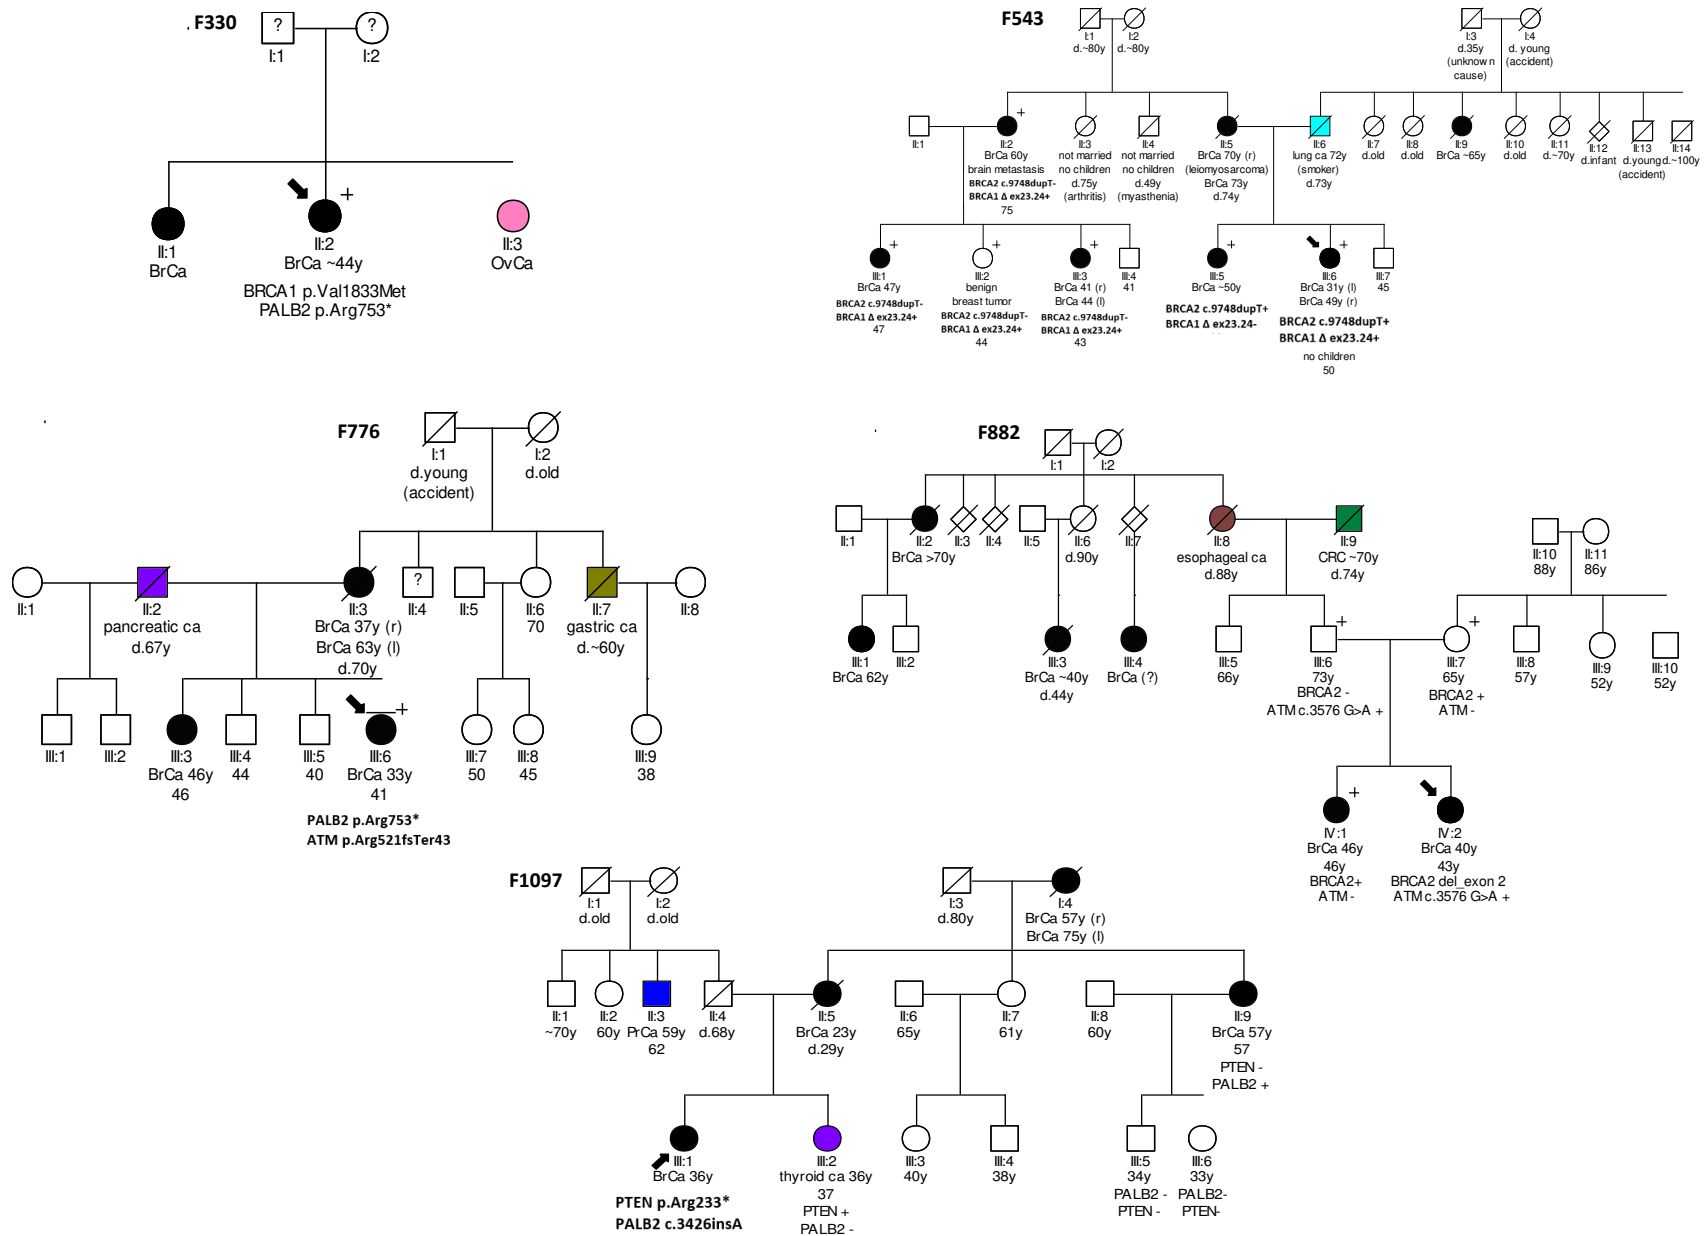

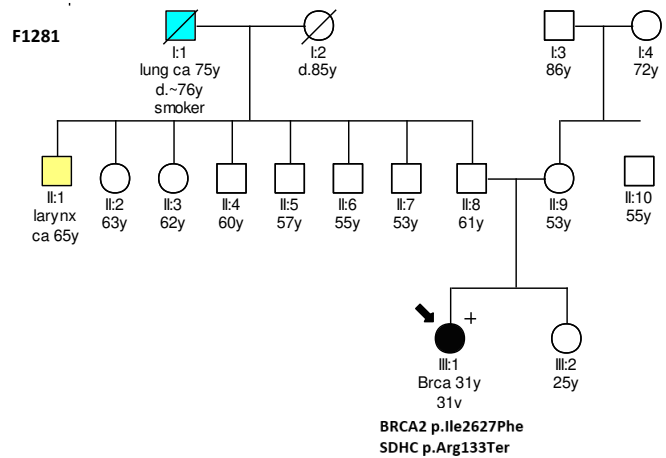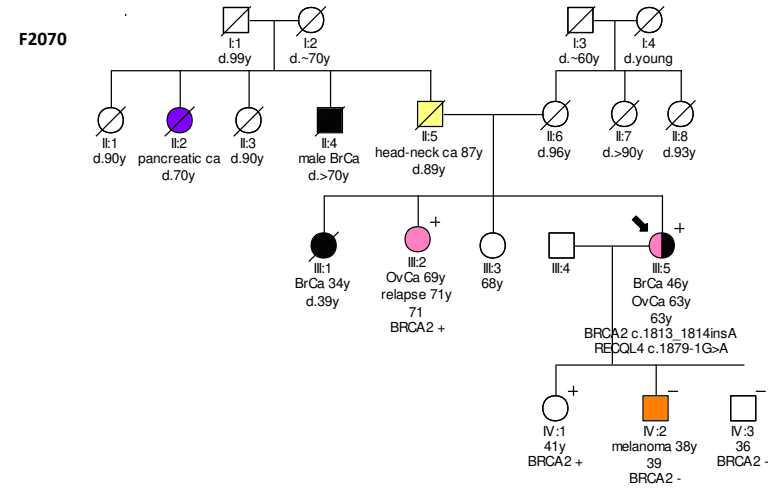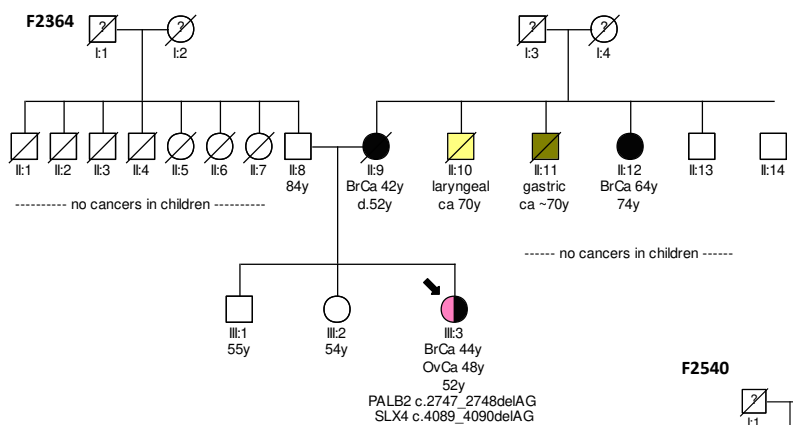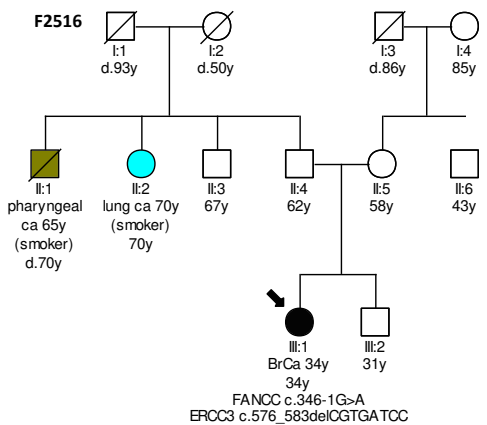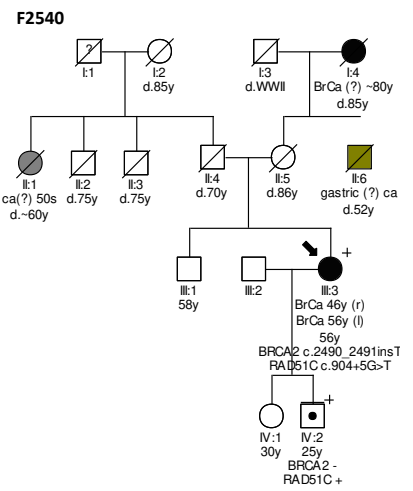

Supplement: jmedgenet-2019-106189supp002.pdf [file jmedgenet-2019-106189supp002.pdf]
